# Supplementary material
Source: MDPI journal article supplement (https://www.mdpi.com/1999-4907/12/6/801)
Supplement: s1 [file s1]

# Comparison of physical and mechanical properties of Beech and Walnut wood from Iran and Georgian beech

**Mohammad Najafian Ashrafi<sup>1</sup>, Hooman Shaabani Asrami<sup>1</sup>, Zeynolabedin Vosoughi Rudgar<sup>1</sup>, Mohammad Ghorbanian Far<sup>2</sup>, Ali Heidari<sup>1</sup>, Esmail Rastbod<sup>1</sup>, Hamed Jafarzadeh<sup>1</sup>, Mohammad Salehi<sup>1</sup>, Ehsan Bari<sup>1\*</sup>, Javier Ribera<sup>3, \*</sup>**

1 Department of wood Sciences and Engineering, Technical Faculty of No. 2, Mazandaran Branch, Technical and Vocational University (TVU), Sari, Iran.

2 Department of wood Engineering and Technology, Gorgan University of Agriculture Science and Natural Resources, 4913815739, Gorgan, Iran.

3 Laboratory for Cellulose & Wood Materials, Empa-Swiss Federal Laboratories for Materials Science and Technology, Lerchenfeldstrasse 5, CH-9014 St. Gallen, Switzerland.

\*Correspondence: [bari\\_lenzites@yahoo.com](mailto:bari_lenzites@yahoo.com); [javier.ribera@empa.ch](mailto:javier.ribera@empa.ch)

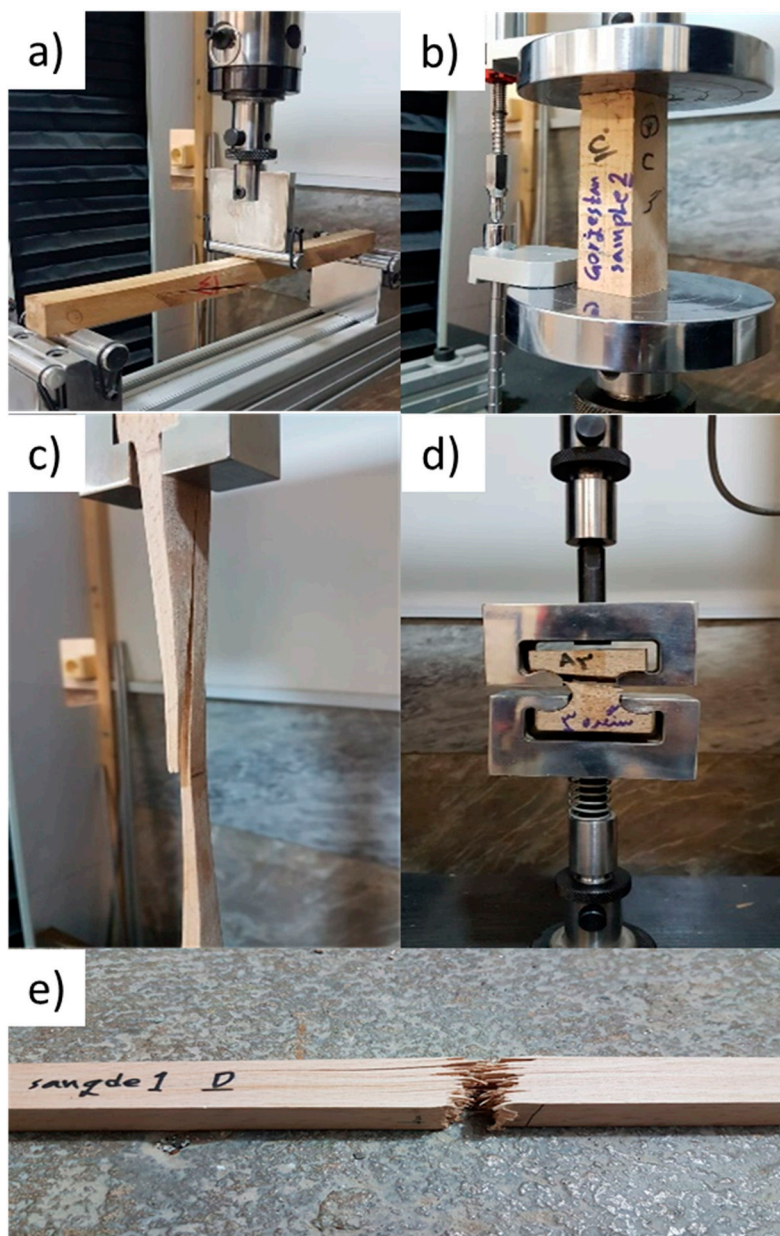

**Figure S1.** **a)** Static bending tests. **b)** Compression parallel to grain tests. **c)** Tensile strength parallel to grain tests. **d)** Tensile strength perpendicular to grain tests. **e)** Impact bending tests.
